# Supplementary material
Source: PubMed Central journal article supplement (PMC5619956)
Supplement: ASN.2016101059SupplementaryData.pdf [file ASN.2016101059SupplementaryData.pdf]

### LDKT from Offspring or Spouse

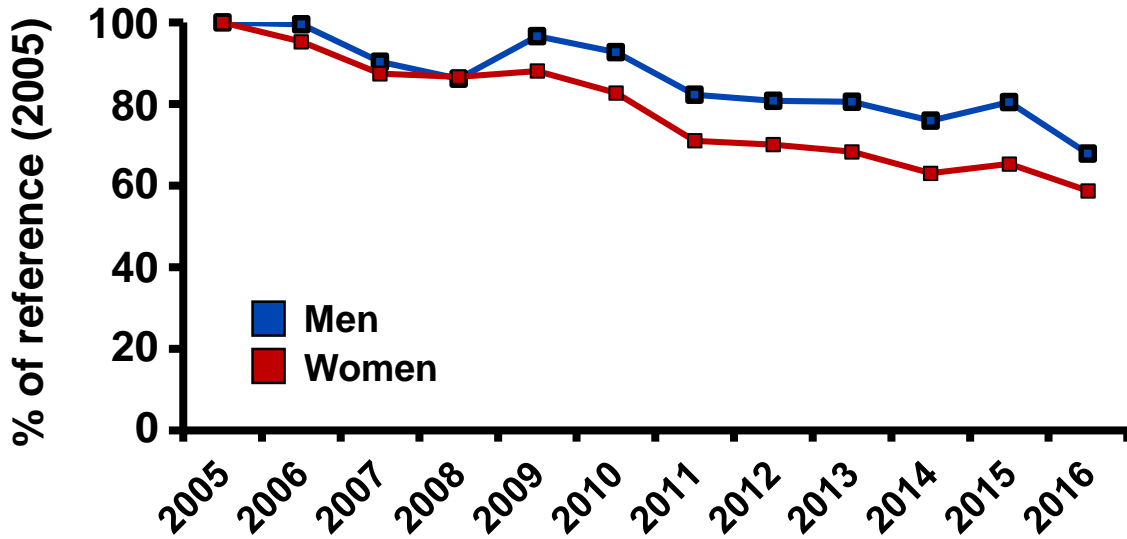

### LDKT from All Other Donor Types (non-offspring, non-spouse)

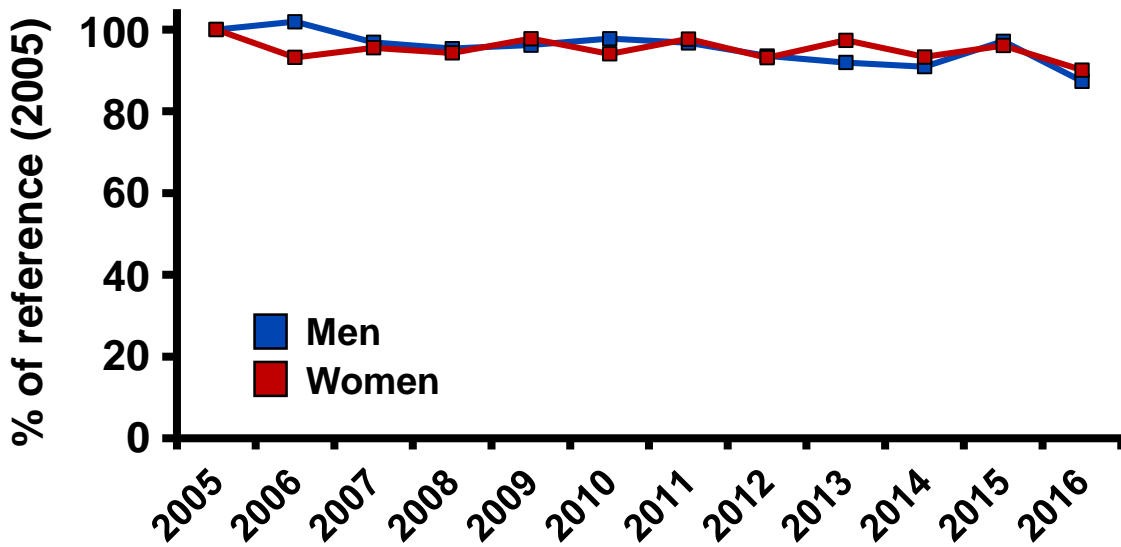

Adapted from  
<https://optn.transplant.hrsa.gov/data/view-data-reports/national-data/>

Fig S1
